# Supplementary material for: Diversification of Schistosoma japonicum in Mainland China Revealed by Mitochondrial DNA
Source: PLoS Negl Trop Dis. 2012 Feb 14;6(2):e1503. doi: 10.1371/journal.pntd.0001503 (PMC3279335; doi:10.1371/journal.pntd.0001503)
Supplement: Table S1 — Within-locality diversity of Schistosoma japonicum from 18 localities in mainland China based on Cytb-ND4L-ND4 fragment. (XLS) [file pntd.0001503.s001.xls]

## Sheet: Cytb-ND4L-ND4
Locality	n	µ	h	π
HBwh	10	6	0.867 ± 0.085	0.0056 ± 0.0006
HBjz	10	7	0.911 ± 0.077	0.0025 ± 0.0004
HBqj	10	6	0.911 ± 0.062	0.0032 ± 0.0004
HByx	10	8	0.945 ± 0.054	0.0045 ± 0.0006
HBhh	10	2	0.533 ± 0.095	0.0013 ± 0.0002
HBga	10	3	0.644 ± 0.101	0.0033 ± 0.0005
HNlx	10	4	0.711 ± 0.117	0.0011 ± 0.0003
HNxy	10	3	0.644 ± 0.101	0.0016 ± 0.0003
HNhr	10	7	0.911 ± 0.077	0.0033 ± 0.0005
AHtl	10	3	0.644 ± 0.101	0.0023 ± 0.0003
AHgc	10	4	0.644 ± 0.152	0.0017 ± 0.0007
AHzy	10	2	0.467 ± 0.132	0.0006 ± 0.0002
JXxj	10	5	0.844 ± 0.080	0.0025 ± 0.0006
JXpz	10	3	0.644 ± 0.101	0.0035 ± 0.0005
JSzj	10	5	0.867 ± 0.071	0.0030 ± 0.0004
SCxc	10	2	0.200 ± 0.154	0.0010 ± 0.0008
YNey	10	1	0.000 ± 0.000	0.0000 ± 0.0000
YNhq	10	1	0.000 ± 0.000	0.0000 ± 0.0000
All	180	39	0.916 ± 0.011	0.0035 ± 0.0002
The names of sample localities were abbreviated as the same as in Table 1.
For Cytb-ND4L-ND4, the haplotype and nucleotide diversity in populations in the ML reaches were all higher than those in populations in the SW China region.
n, the number of worms sequenced; µ, the number of unique haplotypes within a locality; h, haplotype diversity ± standard deviation; π, nucleotide diversity ± standard deviation.
