# Supplementary material for: Diversification of Schistosoma japonicum in Mainland China Revealed by Mitochondrial DNA
Source: PLoS Negl Trop Dis. 2012 Feb 14;6(2):e1503. doi: 10.1371/journal.pntd.0001503 (PMC3279335; doi:10.1371/journal.pntd.0001503)
Supplement: Table S2 — Within-locality diversity of Schistosoma japonicum from 18 localities in mainland China based on ND1 fragment. (XLS) [file pntd.0001503.s002.xls]

## Sheet:  ND1
Locality	n	µ	h	π
HBwh	9	5	0.806 ± 0.120	0.0046 ± 0.0014
HBjz	9	7	0.944 ± 0.070	0.0059 ± 0.0010
HBqj	10	6	0.911 ± 0.062	0.0049 ± 0.0005
HByx	10	7	0.933 ± 0.062	0.0055 ± 0.0010
HBhh	10	2	0.467 ± 0.132	0.0006 ± 0.0002
HBga	11	3	0.636 ± 0.089	0.0057 ± 0.0007
HNlx	10	5	0.844 ± 0.080	0.0046 ± 0.0023
HNxy	10	4	0.711 ± 0.117	0.0046 ± 0.0023
HNhr	10	7	0.867 ± 0.107	0.0049 ± 0.0013
AHtl	10	4	0.733 ± 0.101	0.0022 ± 0.0005
AHgc	10	5	0.756 ± 0.130	0.0035 ± 0.0010
AHzy	10	2	0.467 ± 0.132	0.0012 ± 0.0003
JXxj	10	5	0.756 ± 0.130	0.0036 ± 0.0007
JXpz	10	2	0.556 ± 0.075	0.0029 ± 0.0004
JSzj	10	5	0.867 ± 0.071	0.0039 ± 0.0005
SCxc	10	5	0.867 ± 0.071	0.0027 ± 0.0009
YNey	10	4	0.711 ± 0.117	0.0014 ± 0.0004
YNhq	9	2	0.389 ± 0.164	0.0005 ± 0.0002
All	178	46	0.949 ± 0.008	0.0052 ± 0.0004
The names of sample localities were abbreviated as the same as in Table 1.
For ND1, most of the populations in the ML reaches had also higher haplotype and nucleotide diversity than in populations in the SW China region.
n, the number of worms sequenced; µ, the number of unique haplotypes within a locality; h, haplotype diversity ± standard deviation; π, nucleotide diversity ± standard deviation.
